# Supplementary material
Source: ML conference proceedings conference paper supplement (https://openaccess.thecvf.com/content/CVPR2021/html/Yin_Towards_Efficient_Tensor_CVPR_2021_paper.html)
Supplement: Supplementary file 1 [file Yin_Towards_Efficient_Tensor_CVPR_2021_supplemental.pdf]

# Supplementary Material for "Towards Efficient Tensor Decomposition-Based DNN Model Compression with Optimization Framework"

Miao Yin<sup>1</sup>, Yang Sui<sup>1</sup>, Siyu Liao<sup>2†</sup> and Bo Yuan<sup>1</sup>

<sup>1</sup>Department of ECE, Rutgers University, <sup>2</sup>Amazon

{miao.yin, yang.sui}@rutgers.edu, liasiyu@amazon.com, bo.yuan@soe.rutgers.edu

## Implementation Details

All TT operations are implemented by reshape, transpose and matrix multiplication offered by PyTorch.

For ResNet-18 on ImageNet, the original weight tensor of size  $O \times I \times K \times K$  is reshaped and transposed to size  $O \times K^2 \times I$ . The TT-ranks for FLOPs reduction  $2.47\times$  are summarized in Table 1.

| Layer          | TT-ranks         |
|----------------|------------------|
| layer1.0.conv1 | [1, 64, 64, 1]   |
| layer1.0.conv2 | [1, 64, 64, 1]   |
| layer1.1.conv1 | [1, 64, 64, 1]   |
| layer1.1.conv2 | [1, 64, 64, 1]   |
| layer2.0.conv1 | [1, 120, 60, 1]  |
| layer2.0.conv2 | [1, 100, 100, 1] |
| layer2.1.conv1 | [1, 100, 100, 1] |
| layer2.1.conv2 | [1, 100, 100, 1] |
| layer3.0.conv1 | [1, 200, 150, 1] |
| layer3.0.conv2 | [1, 135, 135, 1] |
| layer3.1.conv1 | [1, 135, 135, 1] |
| layer3.1.conv2 | [1, 135, 135, 1] |
| layer4.0.conv1 | [1, 320, 200, 1] |
| layer4.0.conv2 | [1, 170, 170, 1] |
| layer4.1.conv1 | [1, 170, 170, 1] |
| layer4.1.conv2 | [1, 170, 170, 1] |

Table 1: TT-ranks for ResNet-18.

For other DNN models, the settings keep similar to prior works.

---

<sup>†</sup>This work was done when the author was with Rutgers University.
